# Supplementary material for: Intermittent exposure to traces of green leaf volatiles triggers a plant response
Source: PubMed Central journal article supplement — Sci Rep. 2012 Apr 24;2:378. doi: 10.1038/srep00378 (PMC3334854; doi:10.1038/srep00378), 2012-04-24
Supplement: srep00378-s1.pdf [file srep00378-s1.pdf]

## **Intermittent exposure to traces of green leaf volatiles trigger plant response**

Kaori Shiojiri<sup>1</sup>, Rika Ozawa<sup>1</sup>, Kenji Matsui<sup>2</sup>, Maurice Sabelis<sup>3</sup>, and Junji Takabayashi<sup>1\*</sup>

<sup>1</sup>Center for Ecological Research, Kyoto University 2-509-3, Hirano, Otsu, 520-2113, Japan,

<sup>2</sup>Department of Biological Chemistry, Faculty of Agriculture, and Department of Applied Molecular Bioscience, Graduate School of Medicine, Yamaguchi University, Yamaguchi 753-8515, Japan, <sup>3</sup>Institute for Biodiversity and Ecosystem Dynamics, University of

Amsterdam, Kruislaan 320, 1098 SM Amsterdam, the Netherlands.

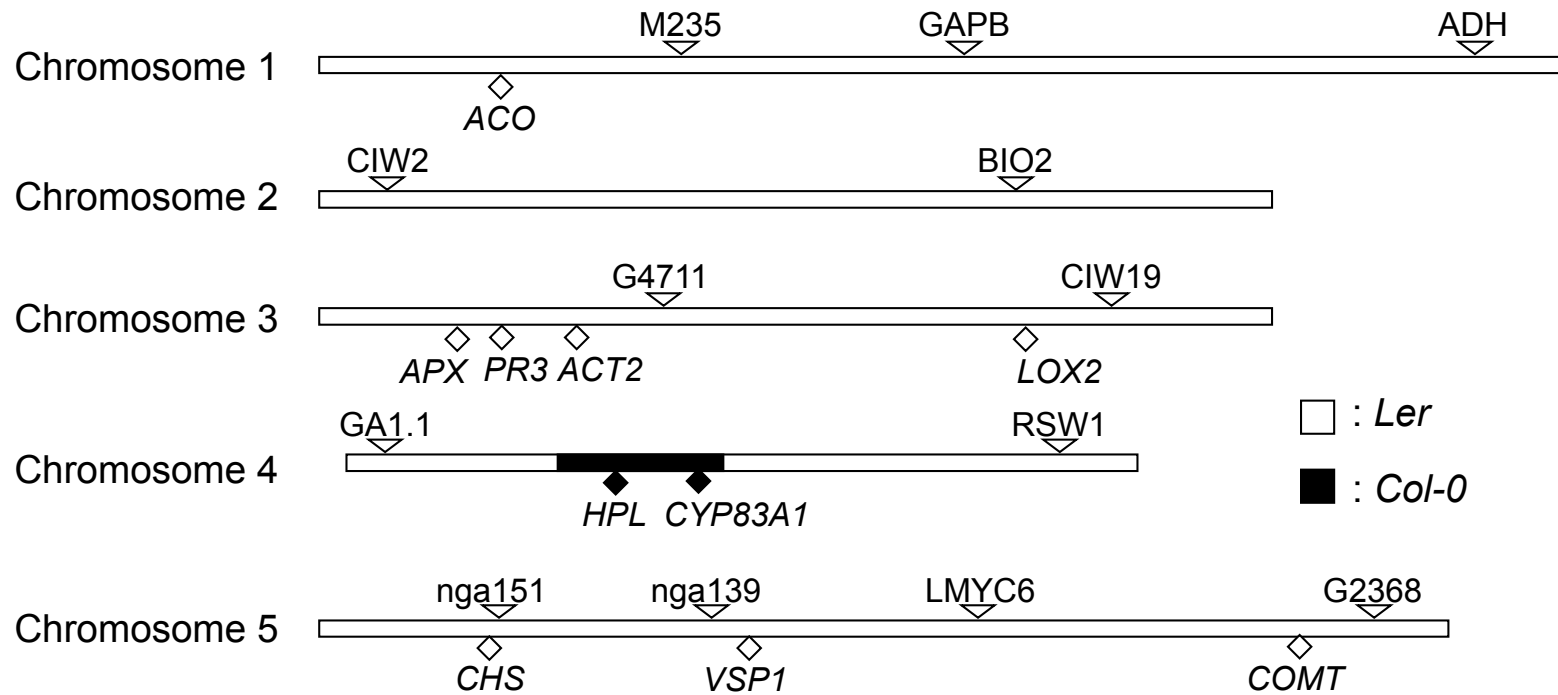

**Supplementary Figure 1.** Genetic map of *hpl1*. DNA markers used to distinguish *Col-0* and *Ler* chromosomes are shown with diamonds or triangles. The black bar shows the region where *Col-0* genotypes were identified.

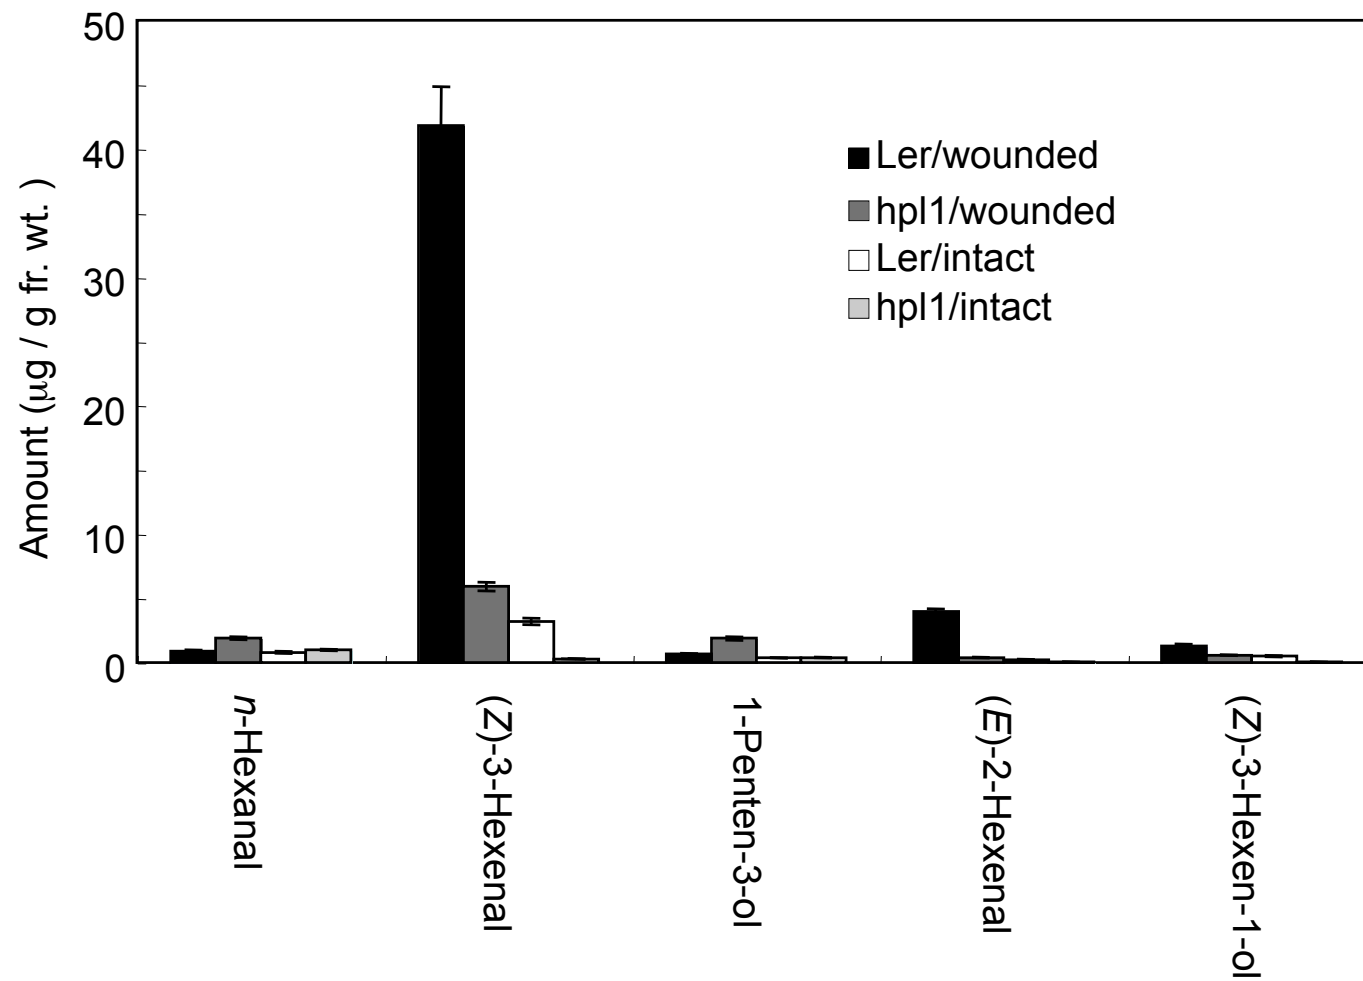

**Supplementary Figure 2.** The amounts of volatiles in the headspace of fully disrupted wt and *hpl1* leaves.
